# Supplementary material for: Transfer of Cobalt Nanoparticles in a Simplified Food Web: From Algae to Zooplankton to Fish
Source: MDPI journal article supplement (doi:10.3390/applnano2030014), 2021-07-22
Supplement: s1 [file s1]

Archive with 1 entries (1 files):
- applnano-1288345-supplementary.pdf
