# Supplementary material for: Transfer of Cobalt Nanoparticles in a Simplified Food Web: From Algae to Zooplankton to Fish
Source: MDPI journal article supplement (doi:10.3390/applnano2030014), 2021-07-22
Supplement: s1 [file s1 › applnano-1288345-supplementary.pdf]

## Supporting information

### **Transfer of cobalt nanoparticles in simplified food web: from algae to zooplankton to fish**

Nanxuan Mei,<sup>a</sup> Jonas Hedberg,<sup>a</sup> Mikael Ekvall,<sup>b,c</sup> Egle Kelpsiene,<sup>c</sup> Lars-Anders Hansson,<sup>b</sup> Tommy Cedervall,<sup>c</sup> Eva Blomberg,<sup>a,d,\*</sup> Inger Odnevall <sup>a,e,f,\*</sup>

<sup>a</sup> KTH Royal Institute of Technology, School of Engineering Sciences in Chemistry, Biotechnology and Health, Department of Chemistry, Div. Surface and Corrosion Science, Drottning Kristinas väg 51, SE-100 44 Stockholm, Sweden.

<sup>b</sup> Aquatic Ecology, Department of Biology, Ecology Building, Lund University, SE-223 62 Lund, Sweden

<sup>c</sup> Center for Molecular Protein Science, Department of Biochemistry and Structural Biology, Lund University, P.O. Box 118, SE-221 00 Lund, Sweden

<sup>d</sup> RISE Research Institutes of Sweden, Division Bioeconomy and Health, Material and Surface Design, Stockholm, Sweden

<sup>e</sup> AIMES - Center for the Advancement of Integrated Medical and Engineering Sciences at Karolinska Institutet and KTH Royal Institute of Technology, Stockholm, Sweden

<sup>f</sup> Karolinska Institutet, Department of Neuroscience, SE-171 77, Stockholm, Sweden

\* Corresponding author, email: EB ([blev@kth.se](mailto:blev@kth.se)), IO ([ingero@kth.se](mailto:ingero@kth.se))

**Table S1.** Composition of tap water (TW) used in this study [1].

|                                             | Unit | Mean value |
|---------------------------------------------|------|------------|
| Conductivity                                | mS/m | 19         |
| Alkalinity, $\text{HCO}_3^-$                | mg/L | 50*        |
| Ammonium, $\text{NH}_4^+$                   | mg/L | <0.01      |
| Nitrite, $\text{NO}_2^-$                    | mg/L | <0.004     |
| Nitrate, $\text{NO}_3^-$                    | mg/L | 0.5        |
| Fluoride, $\text{F}^-$                      | mg/L | 0.11*      |
| Chloride, $\text{Cl}^-$                     | mg/L | 26*        |
| Sulphate, $\text{SO}_4^{2+}$                | mg/L | 5.4        |
| Phosphor as phosphate, $\text{P-PO}_4^{2-}$ | mg/L | <0.005     |
| Total organic carbon                        | mg/L | 2.3*       |
| Iron, Fe                                    | mg/L | 0.02       |
| Manganese, Mn                               | mg/L | <0.01      |
| Calcium, Ca                                 | mg/L | 24         |
| Magnesium, Mg                               | mg/L | 1.5        |
| Copper, Cu                                  | mg/L | 0.02       |
| Sodium, Na                                  | mg/L | 11         |
| Potassium, K                                | mg/L | 1.1        |

\* Indicates annual average value

**Table S2.** Changes in scattered light intensity (kcounts/s) with time for Co NP TW suspensions containing algae and algae + excreted biomolecules.

|       | Co NPs in TW + algae | Co NPs in TW + algae + excreted biomolecules |
|-------|----------------------|----------------------------------------------|
| 5 min | 110.3 ± 62.1         | 281.6 ± 123.0                                |
| 1 h   | 1.3 ± 0.12           | 1.1 ± 0.15                                   |
| +24 h | 3.0 ± 2.0            | 4.2 ± 4.0                                    |

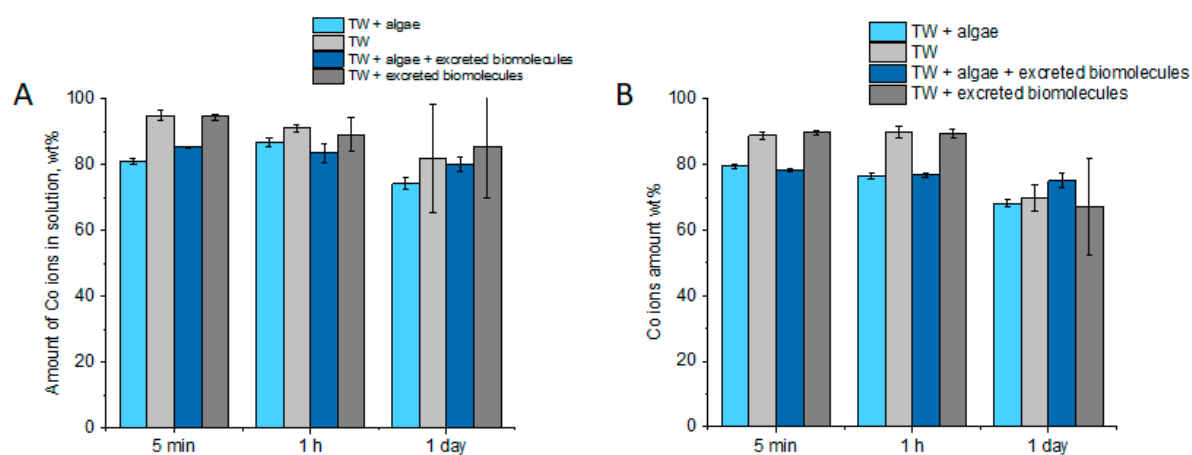

**Figure S1** A: Amount of Co ions (wt%) remaining in solution after 5 min, 1 h, and 1 day after removing algae from the solution (via centrifugation) for two different Co-ion loadings:

**A:** 44; and **B:** 440 µg/L Co. The error bars represent the standard deviation of three individual replicates.

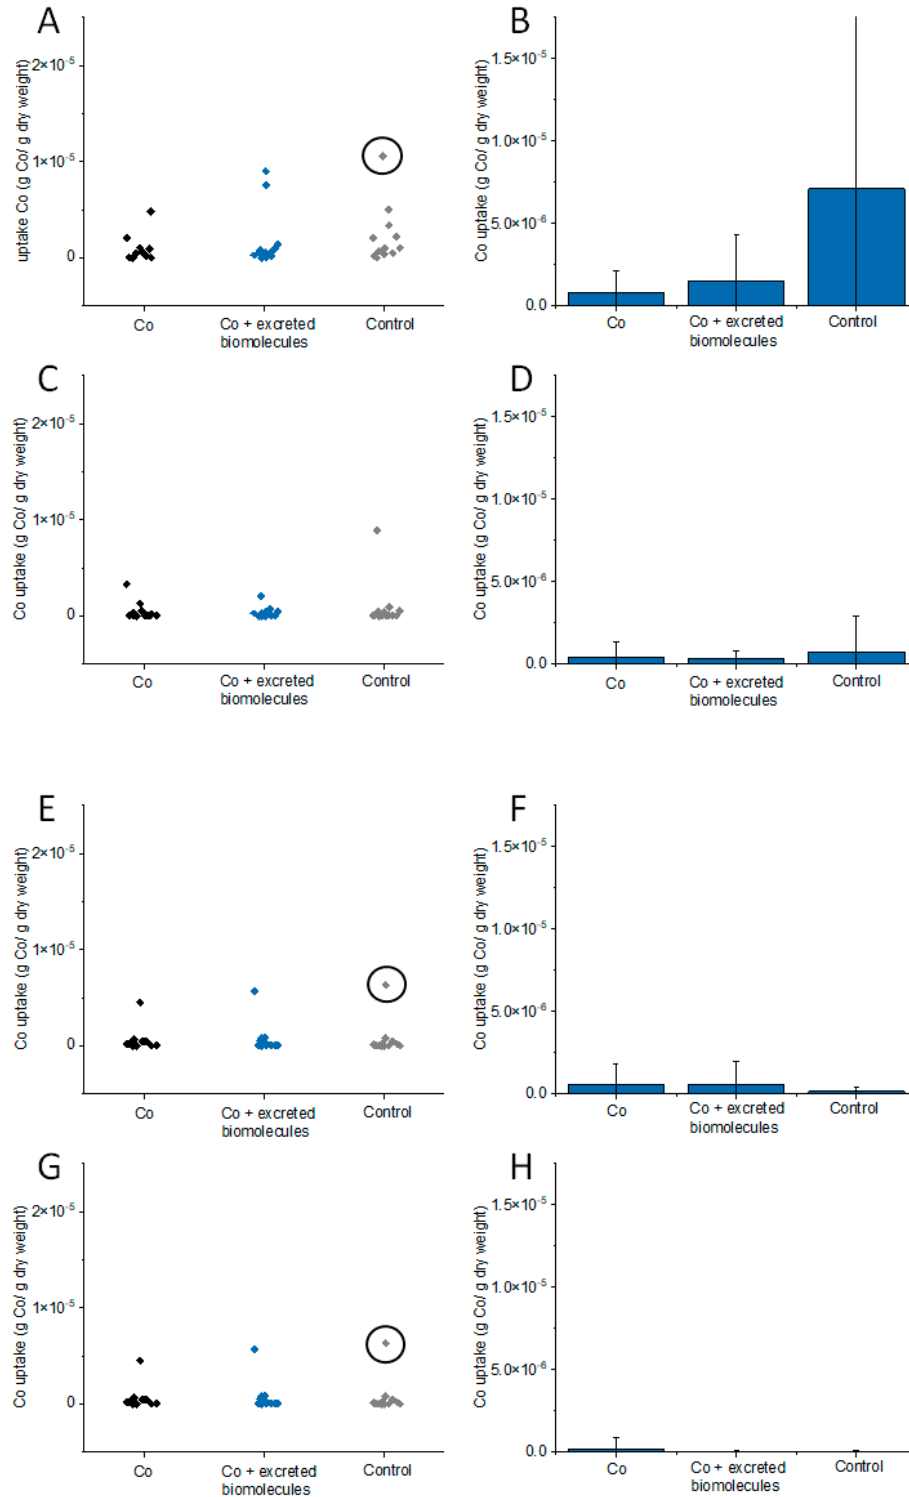

**Figure S2.** Co uptake in fish organs, calculated as g Co per g dry body organ weight. A: Co uptake in fish blood serum for all samples; B: mean values of the Co uptake in fish blood serum; C: Co uptake in fish blood cells for all samples; D: mean values of the Co uptake in fish blood cells; E: Co uptake in the fish brain for all samples; F: mean values of the Co uptake in the fish brain; G: Co uptake in fish muscle for all samples; and H: mean values of the Co uptake in fish muscle. The error bars reflect the value of one standard deviation. The point marked with a circle is the outlier checked by the Grubbs test [2]. This value was removed when calculating the mean values.

## References

1. [https://www.vasyd.se/-/media/Documents/Vattenrapporter/juli2017-juni2018/Lund-Bolmen-juli17-juni18\\_hemsidan.pdf](https://www.vasyd.se/-/media/Documents/Vattenrapporter/juli2017-juni2018/Lund-Bolmen-juli17-juni18_hemsidan.pdf).
2. Miller, J. and J.C. Miller, *Statistics and chemometrics for analytical chemistry*. 2018: Pearson education.
